# Supplementary material for: Hantaviruses and Hantavirus Pulmonary Syndrome, Maranhão, Brazil
Source: PubMed Central journal article supplement (PMC3294554; doi:10.3201/eid1612.100418), 2010-12
Supplement: 10-0418-Techapp_1p.pdf [file 10-0418-Techapp_1p.pdf]

# Hantaviruses and Hantavirus Pulmonary Syndrome, Maranhão, Brazil

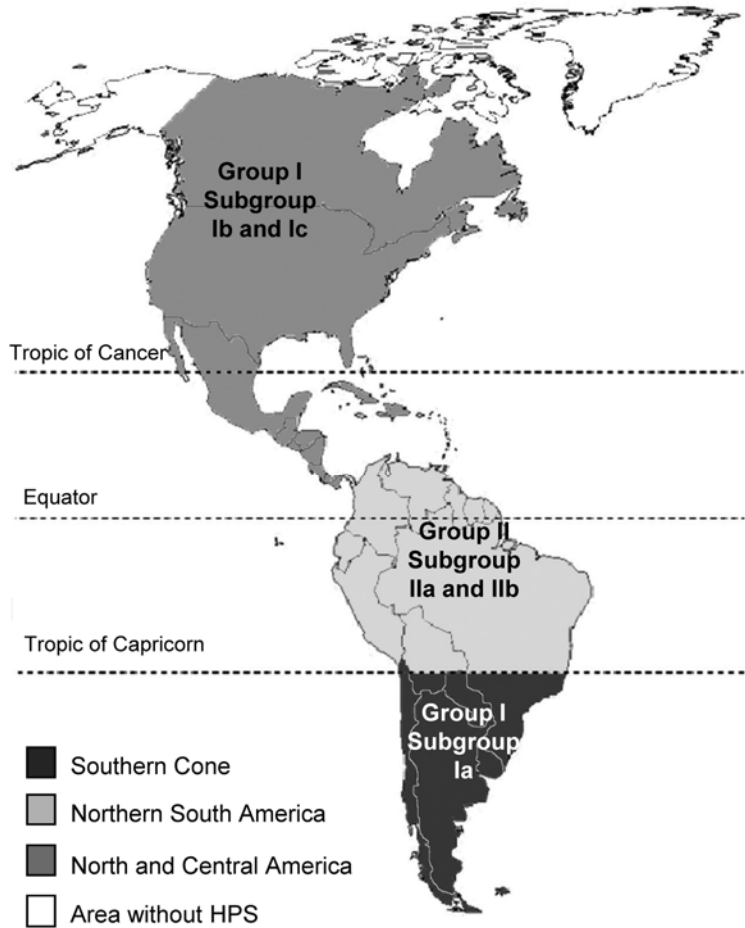

Technical Appendix Figure. Distribution of hantavirus groups and subgroups in the Western Hemisphere. HPS, hantavirus pulmonary syndrome.
